# Supplementary material for: “Augmenting the referral pathway for retinal services among diabetic patients at Reiyukai Eiko Masunaga Eye Hospital, Nepal: a non-randomized, pre-post intervention study”
Source: Springer Nature journal article supplement (doi:10.1186/s12913-023-09105-3), 2023-02-08
Supplement: MOESM1 [file 24005690]

## Annex 2 and 3:

### Pamphlet on Diabetic Retinopathy

रेयुकाई आँखा अस्पतालको रेटिना क्लिनिकमा कसरी जाँचगरिन्छ ?

- स्लिटल्याम्पप्रयोग गरेर रेटिना विशेषज्ञले तपाईंको आँखाजाँचगर्दछ ।
- नानीखुलाउने औषधीप्रयोग गरेर तपाईंको आँखाको पछडीको भाग हेरिन्छ ।
- औषधीलगाए पछीको आँखा केहि समय धमिलो हुन सक्छ यस फाँटगाइहरुको बारेमाथिन्नातिनु पर्दैन किनभने औषधीको प्रभाव छोड्दै गएपछि २/३ घण्टामा दृष्टि सामान्यहुदै जान्छ ।

नानीखुलाउंदाहुने समस्याहरु

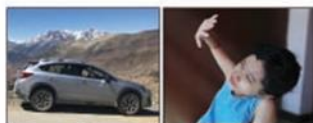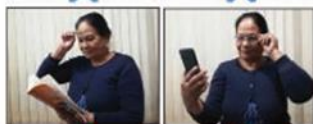

तर नडराउनुहोस २/३ घण्टामा दृष्टि सामान्य

अर्को पटक आउदायाद राख्नुपर्ने कुराहरु

- कृपया आफ्नो चस्मा तथा लेन्स संगै लिएर आउनुहोस ।
- अस्पताल आउदा सकेसम्मकोही सहयोगीको साथआउनु होला ।
- तपाईंलाई आँखामाहालेको औषधीले केही घण्टामा असर गर्छ । त्यस कारण आफैले गाडी बाइकनचलाउनुहोस ।
- आफुलाईमनमालागेको कुरा सोचेर मात्र घर जानु पर्दछ ।

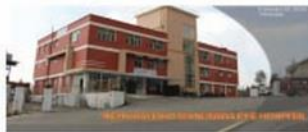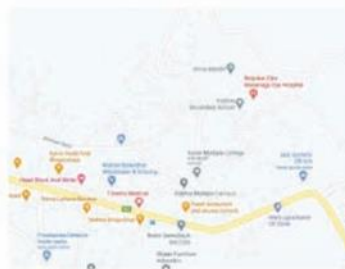

ठेगाना: बुडौल बनेपाईमेल : remyueye@gmail.com फोन नं. : ०११ ६६१५८०

## मधुमेहले तपाईंको आँखामा समस्या ल्याउन सक्छ

मधुमेह रोगबाट आँखामाहुन सक्ने समस्या र त्यसको रोकथामबारे जानकारी

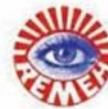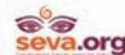

## मधुमेहलेआँखामालाग्न सक्ने रोग रेटिनोप्याथी, एक चिन्तारी

मधुमेह रेटिनोप्याथीविकाशोन्मुख देशहरूमा अन्धोपनको उदयीमानकारण हो । W.H.O को अनुमान छ की D.R संसार भरि नै अन्धोपनको ३७ करोड मध्य ४८%को लागी जिम्मेवार छ । २० वर्ष भन्दा माथिका मानिसहरूमा नेपालमा मधुमेहको प्रकोप १४.६% र ४० वर्ष माथिका मानिसहरूमा १९% भन्दा बढी रहेको छ । लगभग १०% मधुमेह रोगीहरू नेपालमा रेटिनोप्याथी भएको पाइएको छ ।

रेयुकाई आँखा अस्पताल पुगेपछि के गर्ने त ?

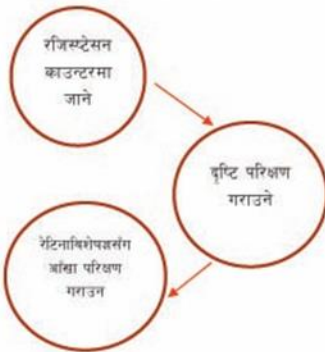

## मधुमेह रोगीकालागी प्रारम्भिक र निवमित आँखा जाँच किन महत्वपूर्ण छ ?

- मुख्य विशेषता के छ भने तपाइले पहिलो चरणमा कुनै पनि आँखा रोग सम्बन्धित लक्षण देखेहुन्न ।
- प्रारम्भिक आँखा जाँचले आफु सजग हुन आँखाको पढा पछाडि आएको परिवर्तन देखाउछ ।
- यदि आँखामा आएको परिवर्तन समयमा पत्ता लाग्यो भने आँखामा उपचार प्रभावकारी रहन्छ र दृष्टिहीन हुन बाट जोगाउछ ।
- त्यसकारण नियमित आँखा जाँच आवश्यक छ ।

के हामी यस अवस्थाबाट बच्न मोतिविन्दु शल्यक्रिया गरि अथवा पढन र टाढाको वस्तु हेर्न चस्माको प्रयोग गर्न सक्छौं

- मधुमेहबाट आँखामा भएको परिवर्तनहरू मोतिविन्दु वा चस्माका साथ भ्रमित गर्नु हुँदैन ।
- हामी आँखाको बाहिरी भागको त्रुटिहरू सुल्काउन वा लेन्स पावरका परिवर्तनको सच्याउन चश्मा प्रयोग गर्छौं ।
- जब प्राकृतिक लेन्स अपारदर्शी र बाक्लो हुन्छ तब मोतिविन्दु शल्यक्रिया र intra ocular lens प्रत्यारोपण गरिन्छ ।
- त्यसकारण चस्माको प्रयोग वामोतिविन्दुको शल्यक्रिया मधुमेहले गर्ने सक्ने क्षति रोक्न सक्दैन ।
- यस बाहेक कुनै पनि आँखाको इन्फेक्सन वा स्थानिय उपचारले यस अवस्थालाई रोक्दैन ।
- त्यसकारण तपाइले मोतिविन्दुको शल्यक्रिया गरेपछि पनि अथवा चश्मा प्रयोग गर्दै हुनुहुन्छ भने पनि मधुमेहका विरामीले आँखा जाँच गर्नु पर्नेछ ।

Annex 4:

Referral Slip:

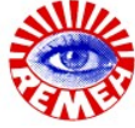

रेयूकाई आईको मासुनागा आँखा अस्पताल  
डाइबेटिक रेटिना आँखा जाच  
रिफरल स्लिप

|          |                        |
|----------|------------------------|
| नाम :    | मिति:                  |
| Name     | Date                   |
| ठेगना :  | फोन नं :               |
| Address: | Phone no:              |
| उमेर :   | लिङ्ग                  |
| Age:     | Sex                    |
|          | रिफर डाक्टर _____      |
|          | Referral Doctor: _____ |
| नोट      | _____                  |
| Note     | _____                  |

रिफर अस्पताल : शीर मेमोरियल अस्पताल ,बनेपा  
Referral Hospital :Scheer Memorial Hospital Banepa

Annex 5:

Pre and post evaluation questionnaire:

## Diabetes Eye Care Education Initiative

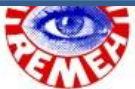

Baseline Questionnaire

**PLEASE TICK / CIRCLE THE ANSWERS**

**A. Out of all the Outpatients/Inpatients seen by you, what percentage of people with diabetes you see in a week?**

- a) 2% - 5%
- b) 5% - 10%
- c) 10% - 20%
- d) More than 20%

**B. Out of total number of people with diabetes, what percentage constitutes people with Diabetic Retinopathy?**

- (a) < 5%
  - (b) 5% - 10%
  - (c) 10% - 20%
  - (d) More than 20%
- 

**1. One of the most common causes of blindness in the working population.**

- a. Cataract
- b. Untreated DR
- c. Refractive Error

d. None

**2. Retinal examination must be done in all people with diabetes, irrespective of the type of diabetes**

- a. Once in 3 years
- b. Once in 5 years
- c. Once a year
- d. When the patient has vision complaints

**3. The symptoms produced in diabetic retinopathy are**

- a. Watering
- b. Itching
- c. Redness and discharge
- d. Blurred vision

**4. The pathogenesis of diabetic retinopathy is due to**

- a. Microvascular occlusion
- b. Microvascular leakage
- c. Both of the above
- d. None of the above

**5. The most important non-modifiable risk factor associated with DR is**

- a. Anemia
- b. Cardiovascular disease
- c. Duration of diabetes
- d. Smoking

**6. All patients with diabetic retinopathy require**

- a. Laser photocoagulation
- b. Glycemic control
- c. Intravitreal anti-VEGFs (vascular endothelial growth factor)
- d. Ocular surgery

**7. Which of the following is the first sign of diabetic retinopathy?**

- a. Hard-exudates
- b. Cotton wool spot
- c. Micro aneurysm
- d. Flame Shaped haemorrhages

**8. Diabetic macular edema is treated with**

- a. Laser
- b. Anti-VEGF
- c. Both of the above

d. None of the above.

**9. Which of following is an indication for panretinal laser photocoagulation**

- a. Moderate non-proliferative diabetic retinopathy
- b. Proliferative diabetic retinopathy
- c. Mild non-proliferative diabetic retinopathy
- d. Diabetic macular edema

**10. Which of the following is NOT an indication for vitrectomy**

- a. Non-clearing vitreous haemorrhage
- b. Tractional retinal detachment
- c. Proliferative diabetic retinopathy
- d. Diabetic macular edema



# Diabetes Eye Care Education Initiative

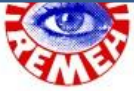

## Post Training Questionnaire

### PLEASE TICK / CIRCLE THE ANSWERS

1. **One of the most common causes of blindness in the working population.**
  - a. Cataract
  - b. Untreated DR
  - c. Refractive Error
  
2. **Retinal examination must be done in all people with diabetes, irrespective of the type of diabetes**
  - e. Once in 3 years
  - f. Once in 5 years
  - g. Once a year
  - h. When the patient has vision complaints
  
3. **The symptoms produced in diabetic retinopathy are**
  - e. Watering
  - f. Itching

- g. Redness and discharge
- h. Diminution of vision

**4. The pathogenesis of diabetic retinopathy is due to**

- e. Microvascular occlusion
- f. Microvascular leakage
- g. Both of the above
- h. None of the above

**5. The most important non-modifiable risk factor associated with DR is**

- e. Anemia
- f. Cardiovascular disease
- g. Duration of diabetes
- h. Smoking

**6. Which of the following is the first sign of diabetic retinopathy?**

- a. Hard-exudates
- b. Cotton wool spot
- e. Micro aneurysm
- f. Flame Shaped haemorrhages

**7. All patients with diabetic retinopathy require**

- a. Laser photocoagulation
- b. Glycemic control
- c. Intravitreal anti-VEGFs (vascular endothelial growth factor)
- d. Ocular surgery

**8. Diabetic macular edema is treated with**

- a. Laser
- b. Anti-VEGF
- c. Both of the above
- d. None of the above.

**9. Which of following is an indication for panretinal laser photocoagulation**

- a. Moderate non-proliferative diabetic retinopathy
- b. Proliferative diabetic retinopathy
- c. Mild non-proliferative diabetic retinopathy
- d. Diabetic macular edema

**10. Which of the following is NOT an indication for vitrectomy**

- a. Non-clearing vitreous haemorrhage
- b. Tractional retinal detachment
- c. Advanced Proliferative diabetic retinopathy
- d. Diabetic macular edema

## Thank You for your Participation in the survey!

Additional file 6:

Patient consent form:

**Informed Consent form**

**Study Title:** Augmenting the referral pathway to improve the uptake of retinal services among Diabetic patients at Reiyukai Eiko Masunaga Eye Hospital, Nepal.

Name: \_\_\_\_\_

Date of Birth/Age: \_\_\_\_\_

**Why is this study being done?**  
We are doing this study to save vision of patients with Diabetes. Diabetic retinopathy is a common and specific microvascular complication of diabetes, and remains the leading cause of preventable blindness in working-aged people. Diabetic Retinopathy if detected early can be treated to preserve the vision. Once vision has been lost it cannot usually be restored.

**Please do initial in box (Subject)**

(i) I confirm that I have read information sheet provided and explained about the study [ ]

(ii) I understand that the researchers and the IRB and other regulatory authorities will not need my permission for further research that may be conducted in relation to it, even if I withdraw from the trial. I agree to this access. However, I understand that my identity will not be revealed in any information released to third parties or published. [ ]

(iii) I agree not to restrict the use of any data or results that arise from this study provided such a use is only for scientific purpose(s) and I agree to take part in the above study. [ ]

Signature (or Thumb impression) of the Subject/Legal Guardian: \_\_\_\_\_

Date: \_\_\_\_/\_\_\_\_/\_\_\_\_ Signatory's

**सु-सूचित मन्जुरीनामा**

अध्ययन शीर्षक: Augmenting the referral pathway to improve the uptake of retinal services among Diabetic patients at Reiyukai Eiko Masunaga Eye Hospital, Nepal

नाम : \_\_\_\_\_

जन्म मिति (उमेर) : \_\_\_\_\_

म \_\_\_\_\_ उमेर \_\_\_\_\_ वर्ष ले यस संस्थानबाट गर्न लाग्नु भएको माथि उल्लेखित शिर्षकको अनुसन्धान सम्बन्धी जानकारी पत्र र प्रश्नोत्तर समेत गरेर यो अध्ययन-अनुसन्धान सम्बन्धमा जानकारी प्राप्त भयो।

यो अनुसन्धानकार्यमा मेरो सहभागिता मेरो व्यक्तिगत इच्छामा भर पर्ने भन्ने कुरा मैले बुझेको छु। यसको लागि मैले कुनै कारण दिनु नपर्ने र त्यसबाट मैले पाउने सेवा र मेरो कानुनी अधिकारमा असर नपर्ने समेत मलाई बुझाईएको छ।

यस अनुसन्धानको प्रतिवेदन वा सम्बन्धित प्रकाशित कृतिहरूमा मेरो कुनै व्यक्तिगत परिचय खुल्ने जानकारी प्रकाशित हुने छैन भन्ने कुरा मैले बुझेको छु।

यी सबै कुराहरू जानी, बुझी, म यस अध्ययन अनुसन्धानमा सहभागी हुन स्वेच्छाले राजी भई यो सुसूचित मन्जुरीनामामा सहिछाप गरेको छु।

सहभागीको सही:-

सहभागीको नाम, धर :

मिति :

सहभागीको बुझी/औंसाको त्याजे

|       |       |
|-------|-------|
|       |       |
| दायाँ | बायाँ |

मिति :-
